# Supplementary material for: Simulations of tumor growth and response to immunotherapy by coupling a spatial agent-based model with a whole-patient quantitative systems pharmacology model
Source: PLoS Comput Biol. 2022 Jul 22;18(7):e1010254. doi: 10.1371/journal.pcbi.1010254 (PMC9348712; doi:10.1371/journal.pcbi.1010254)
Supplement: S2 Table — (XLSX) [file pcbi.1010254.s009.xlsx]

## Sheet: ABM Ref. values
Parameters	Manuscript notation	Code notation	Values	Unit	Reference
Probability of asymmetric division of CSCs	k	asymmetricDivProb	0.95	dimensionless	estimated by Norton 2014 (PubMed:25185580)
Proliferation rate of PCs	rp	progGrowthRate	[QSP tumor growth rate, 0.5]	1/day	maximum estimated by Norton 2014 (PubMed:25185580)
Maximum number of divisions of PCs	dmax	progenitorDivMax	[4, 18]	dimensionless	estimated
Migration rate of CSCs	ucell (ust)	-	[0.03, 4.2]	μm/min	Gligorijevic 2014 (PMID: 25386698) and Patsialou 2013 (PMID: 25013744)
Migration rate of PCs	ucell (up)	-	[0.03, 4.2]	μm/min	Gligorijevic 2014 (PMID: 25386698) and Patsialou 2013 (PMID: 25013744)
Migration rate of SCs (equal to PCs)	ucell (use)	-	[0.03, 4.2]	μm/min	Gligorijevic 2014 (PMID: 25386698) and Patsialou 2013 (PMID: 25013744)
Senescent death rate	𝜇	senescentDeathRate	Slightly higher than cancer cell death rate from QSP	1/day	estimated
Migration rate of effector T cells	ucell (uteff)	-	6.4 ± 2.5	μm/min	Boissonnas 2007 (PMID: 17261634)
Migration rate of cytotoxic and suppressed T cells	ucell (ucyt/supp)	-	1.1 ± 0.4	μm/min	Zinselmeyer 2013 (PMID: 23530125)
Migration rate of regulatory T cells	ucell (utreg)	-	[1.1, 6.4]	μm/min	estimated
Migration rate of MDSCs	ucell (umdsc)	-	[0.33, 0.67]	μm/min	Duarte-Sanmiguel 2020 (PMID: 31988310)
Recruitment volume (%)	R.V.	-	[0.013-0.79]	dimensionless	estimated from Stamatelos 2014 (PMID: 24342178)
ADDITIONAL PARAMETERS
Parameters	Code notation	Values	Unit
Maximum probability of recruitment at the invasive front	MaxProbIF	1	dimensionless
Minimum normalized cancer cell density	MinCCDens	0	dimensionless
No nivo therapy, then set nivoOn = 0; Nivo therapy, then set nivoOn = 1	nivoOn	0	dimensionless
Life span of a T cell (1/k_T0_death or 1/k_T1_death)	lifespanMean (Tcell)	100	days
Maximum number of expansions of Treg (high number is equivalent to no limit of expansions)	div_limit_exp	100000000	dimensionless
Life span of a MDSC (1/kd_MDSC)	lifespanMean (MDSC)	67	days
ESTIMATION OF RECRUITMENT VOLUME
VoxelSize			20 μm
Mean vessel length			130-460 μm	Stamatelos 2014 (PMID: 24342178)
Volume density (volume occupied by tumor vasculature)			0.2-3.4 %	Stamatelos 2014 (PMID: 24342178)
Assuming recruitment can occur at any voxel occupied by tumor vasculature,
the probability of recruitment in a voxel equals the percentage of volume density:
Probability of recruitment in a voxel			0.002-0.034
Assuming that every vessel has a recruitment source from blood to tumor in a voxel,
the probability of the presence of that entry point in a voxel equals the voxel size divided by the mean vessel length (VoxelSize/Mean vessel length):
Probability of recruitment region of a vessel in a voxel			0.043-0.154
Probability of recruitment in a voxel = Probability of recruitment region of a vessel in a voxel * Probability of a vessel in a voxel
Recruitment volume = Probability of a vessel in a voxel = Probability of recruitment in a voxel/Probability of recruitment region of a vessel in a voxel			0.013-0.79

## Sheet: QSP default parameters
Code notation	Value	Unit
k_cell_clear	0.1	1/day
cell	1	cell
day	1	day
vol_cell	2572.44	micrometer^3/cell
vol_Tcell	175.016	micrometer^3/cell
V_Tmin	1e-06	milliliter
C_total	0	cell
T_total	0	cell
T_total_LN	0	cell
R_Tcell	1	cell/day
Tregs_	0	cell
H_APC	0.5	dimensionless
H_mAPC	1	dimensionless
H_PD1_C1	0.9	dimensionless
H_PD1_APC	0.9	dimensionless
H_CD28_C1	0.1	dimensionless
H_CD28_APC	0.1	dimensionless
H_MDSC_C1	1	dimensionless
H_ENT_C1	1	dimensionless
k_C1_growth	0.005	1/day
C_max	8.62891e+11	cell
k_C1_death	3e-05	1/day
k_C1_therapy	0	1/day
initial_tumour_diameter	2.255	centimeter
n_T0_clones	100	dimensionless
Q_T0_in	346.455	cell/day
Q_T0_out	1.13	1/day
k_T0_act	20	1/day
k_T0_pro	1	1/day
k_T0_death	0.01	1/day
q_T0_P_in	0.205425	1/minute
q_T0_P_out	24	1/day
q_T0_T_in	1e-05	1/(centimeter^3*minute)
q_T0_LN_out	24	1/day
k_IL2_deg	0.2	1/minute
k_IL2_cons	6e-06	nanomole/cell/hour
k_IL2_sec	3e-05	nanomole/cell/hour
IL2_50	0.32	nanomolarity
IL2_50_Treg	0.0032	nanomolarity
N0	5	dimensionless
N_costim	6	dimensionless
N_IL2	14	dimensionless
k_Treg	0.244	1/day
H_P0	1	dimensionless
N_aT	1	dimensionless
n_T1_clones	61.36	dimensionless
Q_T1_in	212.606	cell/day
Q_T1_out	1.13	1/day
k_T1_act	20	1/day
k_T1_pro	1	1/day
k_T1_death	0.01	1/day
q_T1_P_in	0.205425	1/minute
q_T1_P_out	24	1/day
q_T1_T_in	1e-05	1/(centimeter^3*minute)
q_T1_LN_out	24	1/day
k_T1	0.134	1/day
k_C_T1	0.736	1/day
H_P1	1	dimensionless
k_APC_mat	1.5	1/day
k_APC_mig	4	1/day
k_APC_death	0.01	1/day
k_mAPC_death	0.02	1/day
APC0_T	400000	cell/milliliter
APC0_LN	1200000	cell/milliliter
k_c	2	1/day
c0	1e-09	molarity
c50	1e-09	molarity
DAMPs	1.34e-14	mole/cell
n_sites_APC	10	dimensionless
kin	14.4	1/day
kout	28.8	1/day
k_P0_up	14.4	1/day/cell
k_xP0_deg	2	1/day
k_P0_deg	17.28	1/day
k_p0_deg	144	1/day
k_P0_on	144000	1/day/molarity
k_P0_d1	1e-07	molarity
p0_50	2.6455e-05	molecule/micrometer^2
P0_C1	1e-08	molarity/cell
A_syn	37.8	micrometer^2
A_Tcell	151.31	micrometer^2
A_cell	907.92	micrometer^2
A_APC	900	micrometer^2
k_M1p0_TCR_on	1	1/(second*molecule/micrometer^2)
k_M1p0_TCR_off	1	1/second
TCR_p0_tot	103.813	molecule/micrometer^2
pTCR_p0_MHC_tot	0	molecule/micrometer^2
k_P1_up	14.4	1/day/cell
k_xP1_deg	2	1/day
k_P1_deg	17.28	1/day
k_p1_deg	144	1/day
k_P1_on	144000	1/day/molarity
k_P1_d1	5.55e-08	molarity
p1_50	2.6455e-05	molecule/micrometer^2
P1_C1	1e-08	molarity/cell
k_M1p1_TCR_on	1	1/(second*molecule/micrometer^2)
k_M1p1_TCR_off	1	1/second
k_M1p1_TCR_p	1	1/second
phi_M1p1_TCR	0.09	1/second
N_M1p1_TCR	10	dimensionless
TCR_p1_tot	103.813	molecule/micrometer^2
pTCR_p1_MHC_tot	0	molecule/micrometer^2
kon_PD1_PDL1	0.0583333	1/(micromolarity*nanometer*second)
q_P_nivo	8.8e-06	liter/second
q_T_nivo	8.52e-05	milliliter/second
q_LN_nivo	3.25e-06	milliliter/second
q_LD_nivo	0.0015	1/minute
k_cl_nivo	0.37	liter/day
gamma_C_nivo	0.61	dimensionless
gamma_P_nivo	0.0452	dimensionless
gamma_T_nivo	0.522	dimensionless
gamma_LN_nivo	0.2	dimensionless
q_P_durv	8.8e-06	1/second
q_T_durv	8.52e-05	1/second
q_LN_durv	3.25e-06	1/second
q_LD_durv	0.0015	1/minute
k_cl_durv	0.4	1/second
gamma_C_durv	0.58	dimensionless
gamma_P_durv	0.056	dimensionless
gamma_T_durv	0.522	dimensionless
gamma_LN_durv	0.2	dimensionless
q_P_ipi	1.15e-05	liter/second
q_T_ipi	8.52e-05	milliliter/second
q_LN_ipi	3.25e-06	milliliter/second
q_LD_ipi	0.0015	1/minute
k_cl_ipi	0.524	liter/day
gamma_C_ipi	0.686	dimensionless
gamma_P_ipi	0.0496	dimensionless
gamma_T_ipi	0.522	dimensionless
gamma_LN_ipi	0.2	dimensionless
kon_PD1_PDL2	0.0766667	1/(micromolarity*nanometer*second)
kon_PD1_nivo	1300000	1/(molarity*second)
kon_PDL1_durv	430000	1/(molarity*second)
kon_CD28_CD80	0.133333	1/(micromolarity*nanometer*second)
kon_CD28_CD86	0.466667	1/(micromolarity*nanometer*second)
kon_CTLA4_CD80	0.733333	1/(micromolarity*nanometer*second)
kon_CTLA4_CD86	0.666667	1/(micromolarity*nanometer*second)
kon_CD80_PDL1	1.05333	1/(micromolarity*nanometer*second)
kon_CTLA4_ipi	383000	1/(molarity*second)
koff_PD1_PDL1	1.435	1/second
koff_PD1_PDL2	0.529	1/second
koff_PD1_nivo	0.00338	1/second
koff_PDL1_durv	0.028595	1/second
koff_CD28_CD80	1.6	1/second
koff_CD28_CD86	28	1/second
koff_CTLA4_CD80	0.44	1/second
koff_CTLA4_CD86	5.2	1/second
koff_CD80_PDL1	6.004	1/second
koff_CTLA4_ipi	0.0069706	1/second
Chi_PD1_nivo	3.33333	1/nanometer
Chi_PDL1_durv	33.3333	1/nanometer
Chi_CTLA4_ipi	3.33333	1/nanometer
PD1_50	6	molecule/micrometer^2
n_PD1	2	dimensionless
CD28_CD8X_50	1700.45	molecule/micrometer^2
n_CD28_CD8X	2	dimensionless
T_PD1_total	60000	molecule
T_CD28_total	184000	molecule
T_CTLA4_syn	400	molecule
T_PDL1_total	1600000	molecule
C1_PDL1_total	387151	molecule
C1_PDL2_total	40000	molecule
C1_CD80_total	40000	molecule
C1_CD86_total	860000	molecule
APC_PDL1_total	1600000	molecule
APC_PDL2_total	2000	molecule
APC_CD80_total	40000	molecule
APC_CD86_total	860000	molecule
Treg_CTLA4_tot	5000	molecule
Treg_CTLA4_50	617.104	molecule
n_Treg_CTLA4	2	dimensionless
k_CTLA4_ADCC	0.289	1/day
H_Treg_T	0	dimensionless
H_Treg_P	0	dimensionless
k_rec_MDSC	1.2	1/day
kd_MDSC	0.015	1/day
IC50_ENT_C	7.211e-08	molarity
k_deg_CCL2	0.06	1/hour
k_deg_NO	135	1/day
k_deg_ArgI	0.173	1/day
k_sec_CCL2	1.3523e-10	nanomole/cell/day
k_sec_NO	3.99388e-07	nanomole/cell/day
k_sec_ArgI	0.0131244	(mU*microliter)/cell/day
IC50_ENT_NO	1.87746e-09	molarity
ki_Treg	1.40217	1/day
IC50_ArgI_CTL	341.178	mU
IC50_NO_CTL	2.68779e-09	molarity
EC50_CCL2_rec	5e-10	molarity
EC50_ArgI_Treg	47.3721	mU
MDSC_max	166432	cell/milliliter
Treg_max	900000	cell/milliliter
IC50_ENT_CCL2	1.62982e-09	molarity
k_brec_MDSC	0.0021	1/day
IC50_ENT_ArgI	3.74e-07	molarity
k_a1_ENT	2.09728	1/hour
k_a2_ENT	5.12429	1/hour
k_cln_ENT	9.24812e-05	mole/(liter*hour)
Kc_ENT	9.37811e-06	mole/liter
lagP	3.6472	hour
durP	0.1797	hour
k_dose2	0.0138	1/hour
q_P_ENT	320	milliliter/second
q_T_ENT	3311.49	milliliter/second
q_LN_ENT	320	milliliter/second
q_LD_ENT	0.0015	1/minute
k_cl_ENT	0.604174	1/hour
gamma_C_ENT	0.55	dimensionless
gamma_P_ENT	0.062	dimensionless
gamma_T_ENT	0.611	dimensionless
gamma_LN_ENT	0.2	dimensionless

## Sheet: Figure 3
Parameters	Manuscript notation	Code notation	Figure 3A and D (first 3D illustration)	Figure 3B and D (second 3D illustration)	Figure 3A and C (third 3D illustration)	Figure S1A and E (first 3D illustration)	Figure S1B and C (second 3D illustration)
Probability of asymmetric division of CSCs	k	asymmetricDivProb	0.95	0.75	0.95	0.95	0.95
Probability of movement of PCs	pmig,p	moveProb	0.01	0.125	0.1	1	0.1
Proliferation rate of PCs (1/day)	rp	progGrowthRate	0.04	0.01	0.04	0.04	0.04
Maximum number of divisions of PCs	dmax	progenitorDivMax	18	18	9	18	18
Parameters for all cases	Manuscript notation	Code notation	Values
Time step (s)	𝜏	SecPerSlide	21600
QSP tumor growth rate (1/day)	kC1,growth	k_C1_growth	0.01
Migration rate of CSCs (μm/min)	ucell (ust)	-	0.03
Senescent death rate (1/day)	𝜇	senescentDeathRate	0.0001
X size (voxels)	-	XSize	150
Y size (voxels)	-	YSize	150
Z size (voxels)	-	ZSize	150
Voxel size (μm)	L	VoxelSize	20
Maximum number of cancer cells per voxel	-	nr_T_voxel_C	1
Scaling factor	𝛾	ScalingFactor	1
Voxels migrated by a cell per timestep (assuming Probability of movement = 1)	𝜈m	MigratedVoxels	1
Mean of the initial normal distribution of cancer cells (distance in number of voxels)	-	mean_init_norm_dist	0
*Standard deviation of the initial normal distribution of cancer cells (distance in number of voxels)	-	sd_init_norm_dist	0.99
Minimum number of cancer cells in QSP to initialize ABM (cells)	-	init_cancer_cell	1
IMPORTANT NOTE:
* The standard deviation of the initial normal distribution has been defined by running the simulation and verifying the following condition:
Initial value of cancer cells in ABM ~ Minimum number of cancer cells in QSP to initialize ABM/Scaling factor, where the "Initial value of cancer cells in ABM" is the ABM output of cancer cells at the beginning of the simulation.
The expression above has to be met to avoid inconsistencies between ABM and QSP. If not, 1) stop the simulation, 2) redefine the standard deviation value, 3) run another simulation, and 4) verify the condition again. Repeat until it is met.
CSC ≡ Cancer stem-like cell
PC ≡ Progenitor cell
Proliferation rate of CSCs (1/day)
Probability of movement of CSCs = ust * 𝜏 /[60 (s/min) * L * 𝜈m)] ---- Manuscript notation: Pmig,st ---- Code notation: moveProb_csc
Probabilities of movement of PCs are not calculated from references. Their values are different in every case to study the influence of the ratio R.	init_cancer_cell

## Sheet: Figures 4 & 5
Parameters	Manuscript notation	Code notation	Figure 4A and 5A	Figure 4B and 5B	Figures 4C and 5C	Figures 6C and 6C
Migration rate of CSCs (μm/min)	ucell (ust)	-	0.42	4.2	0.42	4.2
Maximum number of divisions of PCs	dmax	progenitorDivMax	9	9	4	9
Recruitment volume (%)	R.V.	-	10	10	10	30
Potential recruitment points	-	Sources	337500	337500	337500	1000000
Parameters for all cases	Manuscript notation	Code notation	Values
Time step (s)	𝜏	SecPerSlide	21600
QSP tumor growth rate (1/day)	kC1,growth	k_C1_growth	0.005
Proliferation rate of PCs (1/day)	rp	progGrowthRate	0.01
Probability of asymmetric division of CSCs	k	asymmetricDivProb	0.95
Migration rate of PCs (μm/min)	ucell (up)	-	0.051
Senescent death rate (1/day)	𝜇	senescentDeathRate	0.0001
Migration rate of effector T cells (μm/min)	ucell (uteff)	-	6.1
Migration rate of cytotoxic and suppressed T cells (μm/min)	ucell (ucyt/supp)	-	1.02
Migration rate of regulatory T cells (μm/min)	ucell (utreg)	-	2.04
Migration rate of MDSCs (μm/min)	ucell (umdsc)	-	0.5
X size (voxels)	-	XSize	150
Y size (voxels)	-	YSize	150
Z size (voxels)	-	ZSize	150
Voxel size (μm)	L	VoxelSize	20
Maximum number of cancer cells and MDSCs per voxel	-	nr_T_voxel_C	1
Maximum number of T cells per voxel	-	nr_T_voxel	8
Voxels migrated by a cell per timestep (assuming Probability of movement = 1)	𝜈m	MigratedVoxels	3
Scaling factor	𝛾	ScalingFactor	50000
Probability of recruitment in the core	prec,core	ProbCore	0.05
Probability of recruitment in the normal tissue	prec,normal	MinProbIF	0.005
Cancer cell density at the inner boundary of the IF	𝜌max,IF	MaxCCDens	0.15
Volume for density normalization	Voxels in a cubic volume	LengthNormDens(^3)	3x3x3
*Minimum number of cancer cells in QSP to initialize ABM (cells)	-	init_cancer_cell	87500000
Mean of the initial normal distribution of cancer cells (distance in number of voxels)	-	mean_init_norm_dist	0
**Standard deviation of the initial normal distribution of cancer cells (distance in number of voxels)	-	sd_init_norm_dist	15
Nivo Dose Interval Time (days)	-	nivoDoseIntervalTime	14	Only for cases with treatment (Figure 5)
Nivo Dose (mg/kg)	-	-	3
Molecular weight of Nivo (mg/mol)	-	-	144600000
Patient weight (kg)	-	-	80
Volume of the central compartment (assumed based on patient weight) (m3)	-	V_C	0.006
IMPORTANT NOTE:
* The minimum number of cancer cells in QSP to initialize ABM has been defined low enough to guarantee the absence of T cells and MDSC at the beginning of the ABM simulation.
** The standard deviation of the initial normal distribution has been defined by running the simulation and verifying the following condition:
Initial value of cancer cells in ABM ~ Minimum number of cancer cells in QSP to initialize ABM/Scaling factor, where the "Initial value of cancer cells in ABM" is the ABM output of cancer cells at the beginning of the simulation.
The expression above has to be met to avoid inconsistencies between ABM and QSP. If not, 1) stop the simulation, 2) redefine the standard deviation value, 3) run another simulation, and 4) verify the condition again. Repeat until it is met.
CSC ≡ Cancer stem-like cell
PC ≡ Progenitor cell
Sources = XSize * YSize * Zsize * Recruitment volume
Probability of movement = ucell * 𝜏 /[60 (s/min) * L * 𝜈m * 𝛾^(1/3)]	Factor 𝛾^(1/3) needed when ABM is used as a coarse-grained model (see Discussion/Technical limitations off the QSP-ABM coupling/ ABM as a coarse-grained model for the whole tumor)
Manuscript notation: Pmig,cell ---- Code notation: <CancerCell> <moveProb_csc> for CSC; <CancerCell> <moveProb> for PC; <TCell> <moveProb> for Teff; <TCell> <moveProb_cyt_or_supp> for Tcyt/Tsupp; <Treg> <moveProb> for Treg; <MDSC> <moveProb> for MDSC
Nivo dose in mol/m3 = Nivo Dose * Patient weight / (Molecular weight of Nivo * Volume of the central compartment) ----- Code notation: NivoDose

## Sheet: Figures 7 & 8
QSP Parameters	Manuscript notation	Code notation	Slow growth rate	Medium growth rate	Fast growth rate
QSP tumor growth rate (1/day)	kC1,growth	k_C1_growth	0.005	0.01	0.015
Rate of cancer cell death by T cells (1/day)	kC,T1	k_C_T1	0.7	1.4	1.4
Inhibition rate of cytotoxic T cells by regulatory T cells (1/day)	kT1	k_T1	0.134	0.27	0.27
Maximal regulatory T cell density in the tumor (cell/mL)	Treg,max	Treg_max	900000	2000000	2000000
ABM Parameters	Manuscript notation	Code notation	Slow growth rate	Medium growth rate	Fast growth rate
Proliferation rate of PCs (1/day)	rp	progGrowthRate	0.005	0.01	0.015
Migration rate of PCs (μm/min)	ucell (up)	-	0.000136	0.0068	0.34
Cancer cell density at the inner boundary of the IF	𝜌max,IF	MaxCCDens	0.02	0.035	0.017
Parameters for all cases	Manuscript notation	Code notation	Values
Time step (s)	𝜏	SecPerSlide	21600
Probability of asymmetric division of CSCs	k	asymmetricDivProb	0.95
Maximum number of divisions of PCs	dmax	progenitorDivMax	9
Senescent death rate (1/day)	𝜇	senescentDeathRate	0.0001
Migration rate of CSCs (μm/min)	ucell (ust)	-	0.136
Migration rate of effector T cells (μm/min)	ucell (uteff)	-	6.1
Migration rate of cytotoxic and suppressed T cells (μm/min)	ucell (utcyt/supp)	-	1.02
Migration rate of regulatory T cells (μm/min)	ucell (utreg)	-	2.04
Migration rate of MDSCs (μm/min)	ucell (umdsc)	-	0.5
X size (voxels)	-	XSize	200
Y size (voxels)	-	YSize	200
Z size (voxels)	-	ZSize	20
Voxel size (μm)	L	VoxelSize	20
Maximum number of cancer cells and MDSCs per voxel	-	nr_T_voxel_C	1
Maximum number of T cells per voxel	-	nr_T_voxel	8
Voxels migrated by a cell per timestep (assuming Probability of movement = 1)	𝜈m	MigratedVoxels	111
Scaling factor	𝛾	ScalingFactor	50000
Recruitment volume (%)	R.V.	-	5
Probability of recruitment in the core	prec,core	ProbCore	0.05
Probability of recruitment in the normal tissue	prec,normal	MinProbIF	0.001
Volume for density normalization	Voxels in a cubic volume	LengthNormDens(^3)	5x5x5
*Minimum number of cancer cells in QSP to initialize ABM (cells)	-	init_cancer_cell	94000000
Mean of the initial normal distribution of cancer cells (distance in number of voxels)	-	mean_init_norm_dist	0
**Standard deviation of the initial normal distribution of cancer cells (distance in number of voxels)	-	sd_init_norm_dist	15
Nivo Dose Interval Time (days)	-	nivoDoseIntervalTime	14	Only for cases with treatment (Figure 8)
Nivo Dose (mg/kg)	-	-	3
Molecular weight of Nivo (mg/mol)	-	-	144600000
Patient weight (kg)	-	-	80
Volume of the central compartment (assumed based on patient weight) (m3)	-	V_C	0.006
IMPORTANT NOTE:
* The minimum number of cancer cells in QSP to initialize ABM has been defined low enough to guarantee the absence of T cells and MDSC at the beginning of the ABM simulation.
** The standard deviation of the initial normal distribution has been defined by running the simulation and verifying the following condition:
Initial value of cancer cells in ABM ~ Minimum number of cancer cells in QSP to initialize ABM/Scaling factor, where the "Initial value of cancer cells in ABM" is the ABM output of cancer cells at the beginning of the simulation.
The expression above has to be met to avoid inconsistencies between ABM and QSP. If not, 1) stop the simulation, 2) redefine the standard deviation value, 3) run another simulation, and 4) verify the condition again. Repeat until it is met.
CSC ≡ Cancer stem-like cell
PC ≡ Progenitor cell
Sources = XSize * YSize * Zsize * Recruitment volume	Sources = XSize * YSize * Zsize * Recruitment volume	Sources = XSize * YSize * Zsize * Recruitment volume	Sources = XSize * YSize * Zsize * Recruitment volume	Sources = XSize * YSize * Zsize * Recruitment volume	Sources = XSize * YSize * Zsize * Recruitment volume	Sources = XSize * YSize * Zsize * Recruitment volume	Sources = XSize * YSize * Zsize * Recruitment volume	Sources = XSize * YSize * Zsize * Recruitment volume	Sources = XSize * YSize * Zsize * Recruitment volume	Sources = XSize * YSize * Zsize * Recruitment volume	Sources = XSize * YSize * Zsize * Recruitment volume	Sources = XSize * YSize * Zsize * Recruitment volume	Sources = XSize * YSize * Zsize * Recruitment volume	Sources = XSize * YSize * Zsize * Recruitment volume	Sources = XSize * YSize * Zsize * Recruitment volume	Sources = XSize * YSize * Zsize * Recruitment volume	Sources = XSize * YSize * Zsize * Recruitment volume	Sources = XSize * YSize * Zsize * Recruitment volume	Sources = XSize * YSize * Zsize * Recruitment volume	Sources = XSize * YSize * Zsize * Recruitment volume	Sources = XSize * YSize * Zsize * Recruitment volume	Sources = XSize * YSize * Zsize * Recruitment volume	Sources = XSize * YSize * Zsize * Recruitment volume	Sources = XSize * YSize * Zsize * Recruitment volume	Sources = XSize * YSize * Zsize * Recruitment volume	Sources = XSize * YSize * Zsize * Recruitment volume	Sources = XSize * YSize * Zsize * Recruitment volume	Sources = XSize * YSize * Zsize * Recruitment volume	Sources = XSize * YSize * Zsize * Recruitment volume	Sources = XSize * YSize * Zsize * Recruitment volume	Sources = XSize * YSize * Zsize * Recruitment volume	Sources = XSize * YSize * Zsize * Recruitment volume	Sources = XSize * YSize * Zsize * Recruitment volume	Sources = XSize * YSize * Zsize * Recruitment volume	Sources = XSize * YSize * Zsize * Recruitment volume	Sources = XSize * YSize * Zsize * Recruitment volume	Sources = XSize * YSize * Zsize * Recruitment volume	Sources = XSize * YSize * Zsize * Recruitment volume	Sources = XSize * YSize * Zsize * Recruitment volume	Sources = XSize * YSize * Zsize * Recruitment volume	Sources = XSize * YSize * Zsize * Recruitment volume	Sources = XSize * YSize * Zsize * Recruitment volume	Sources = XSize * YSize * Zsize * Recruitment volume	Sources = XSize * YSize * Zsize * Recruitment volume	Sources = XSize * YSize * Zsize * Recruitment volume	Sources = XSize * YSize * Zsize * Recruitment volume	Sources = XSize * YSize * Zsize * Recruitment volume	Sources = XSize * YSize * Zsize * Recruitment volume	Sources = XSize * YSize * Zsize * Recruitment volume
Probability of movement = ucell * 𝜏 /[60 (s/min) * L * 𝜈m]
Manuscript notation: Pmig,cell ---- Code notation: <CancerCell> <moveProb_csc> for CSC; <CancerCell> <moveProb> for PC; <TCell> <moveProb> for Teff; <TCell> <moveProb_cyt_or_supp> for Tcyt/Tsupp; <Treg> <moveProb> for Treg; <MDSC> <moveProb> for MDSC
Nivo dose in mol/m3 = Nivo Dose * Patient weight / (Molecular weight of Nivo * Volume of the central compartment) ----- Code notation: NivoDose
[truncated: 5,000 more columns]
